# Supplementary material
Source: MDPI journal article supplement (https://www.mdpi.com/2079-6447/2/1/4)

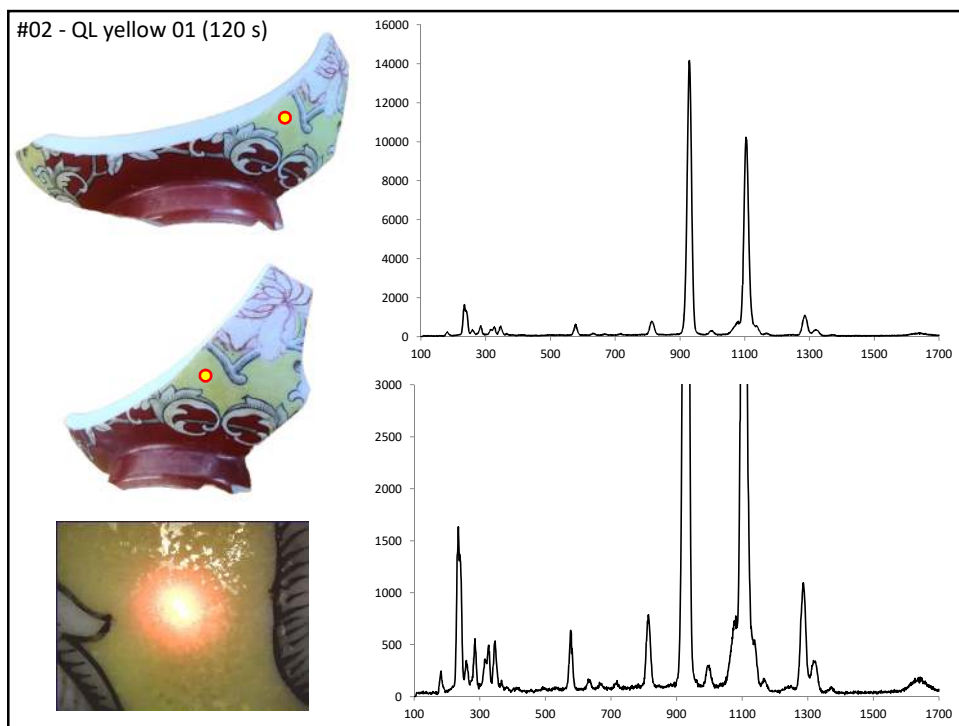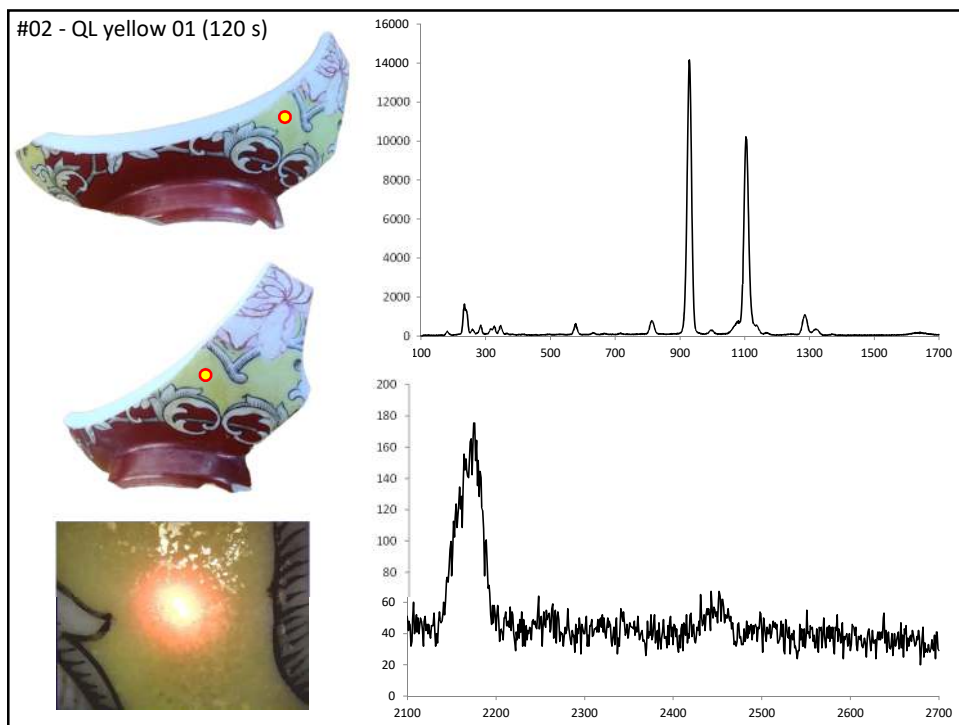

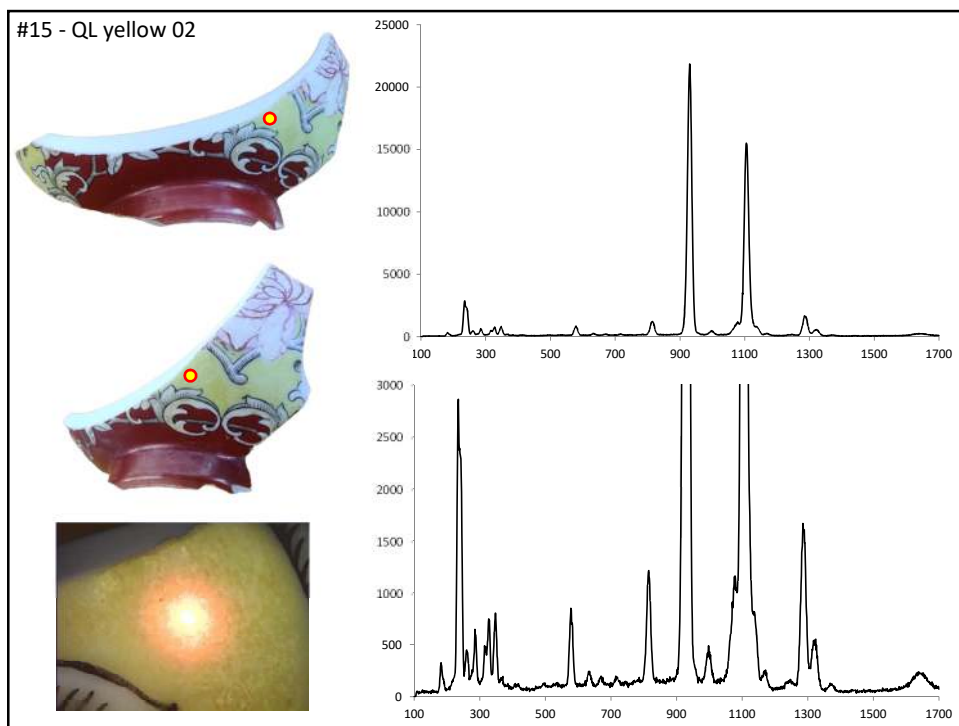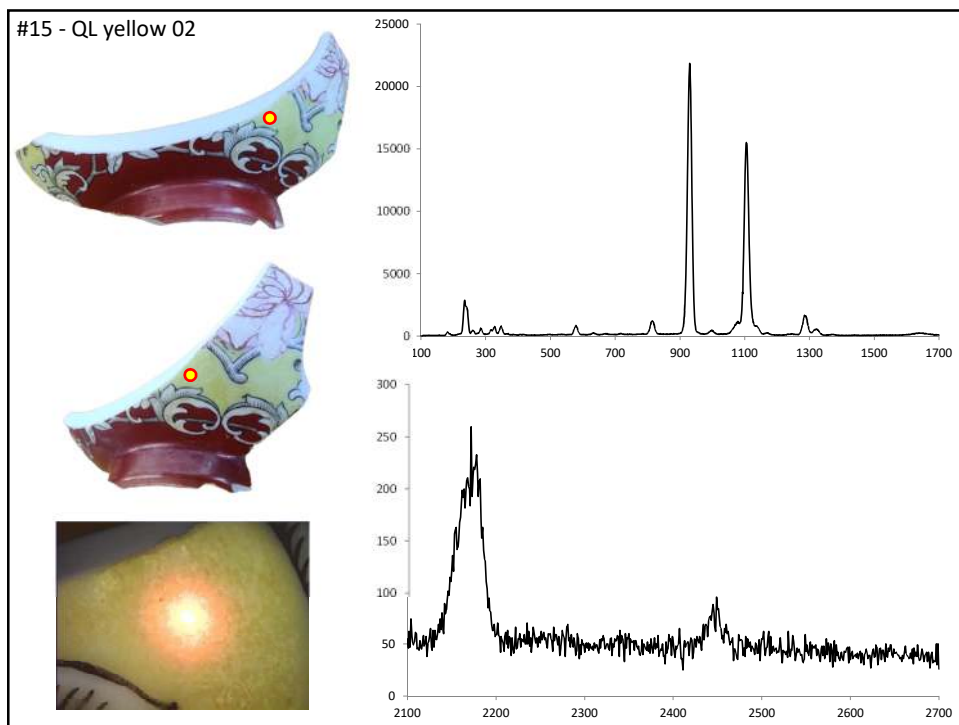

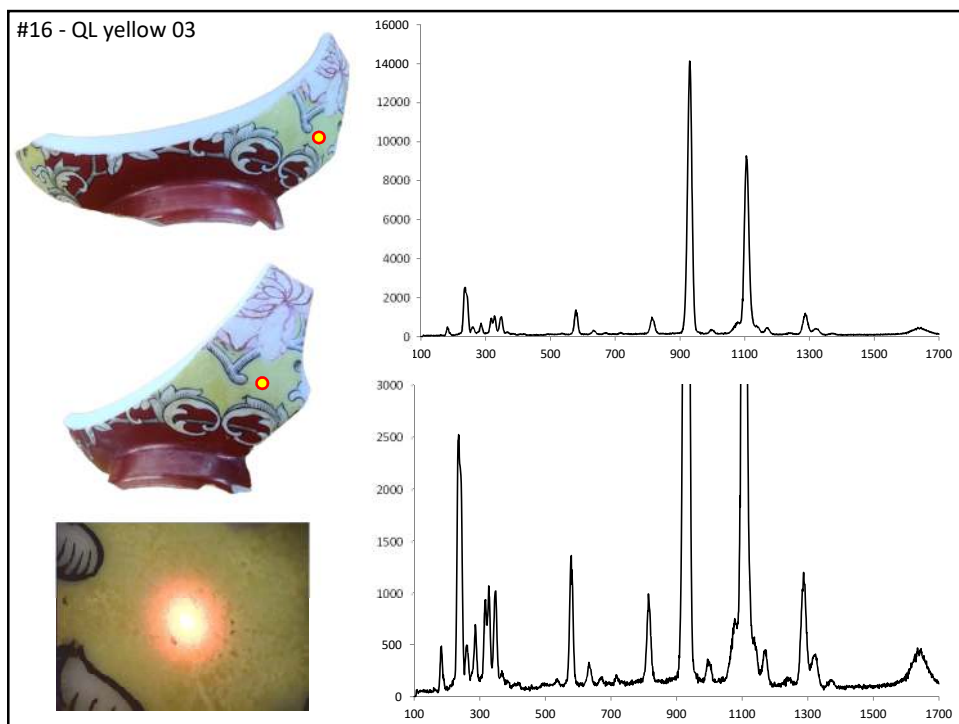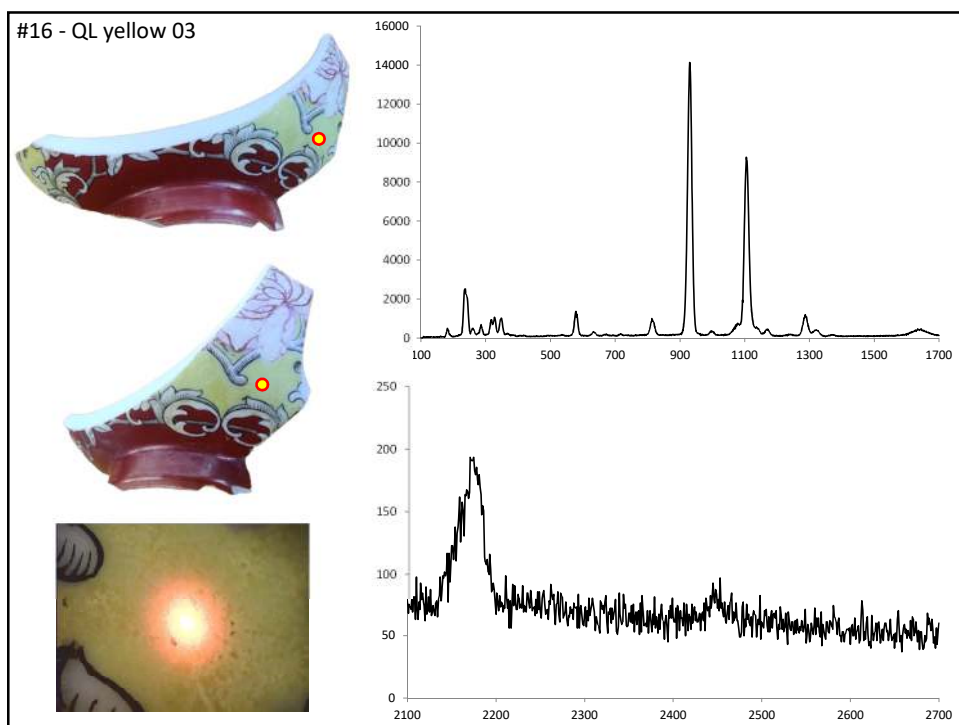

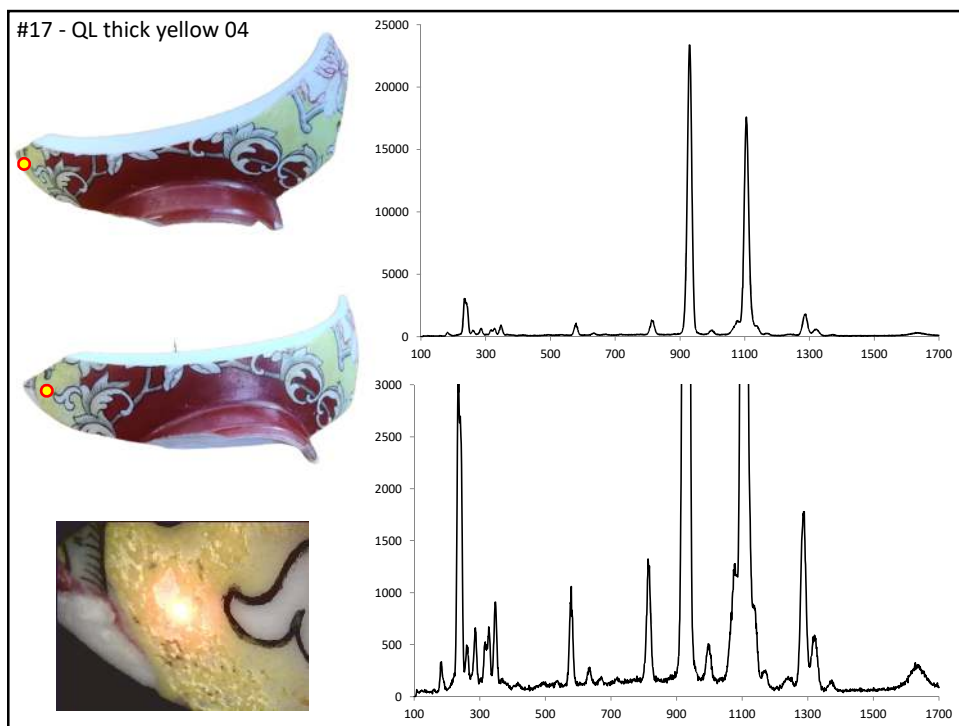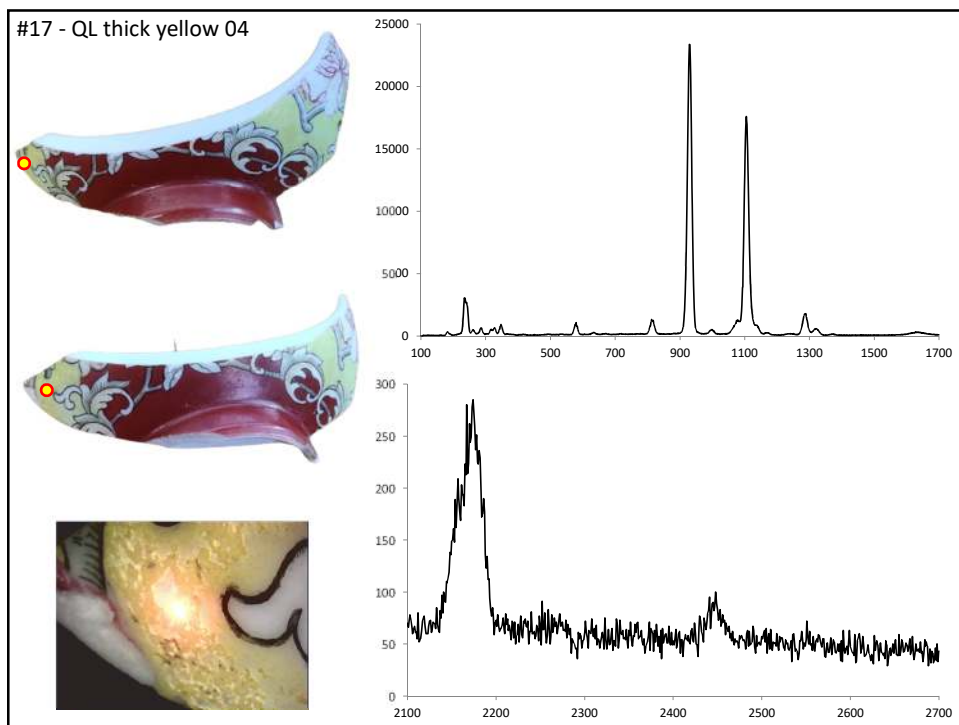

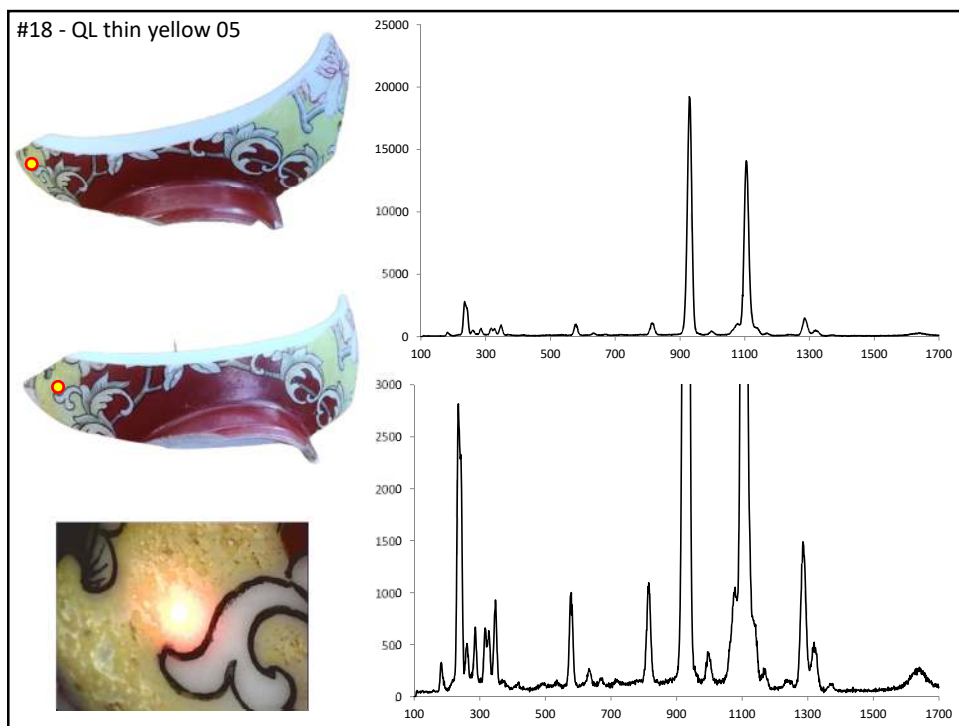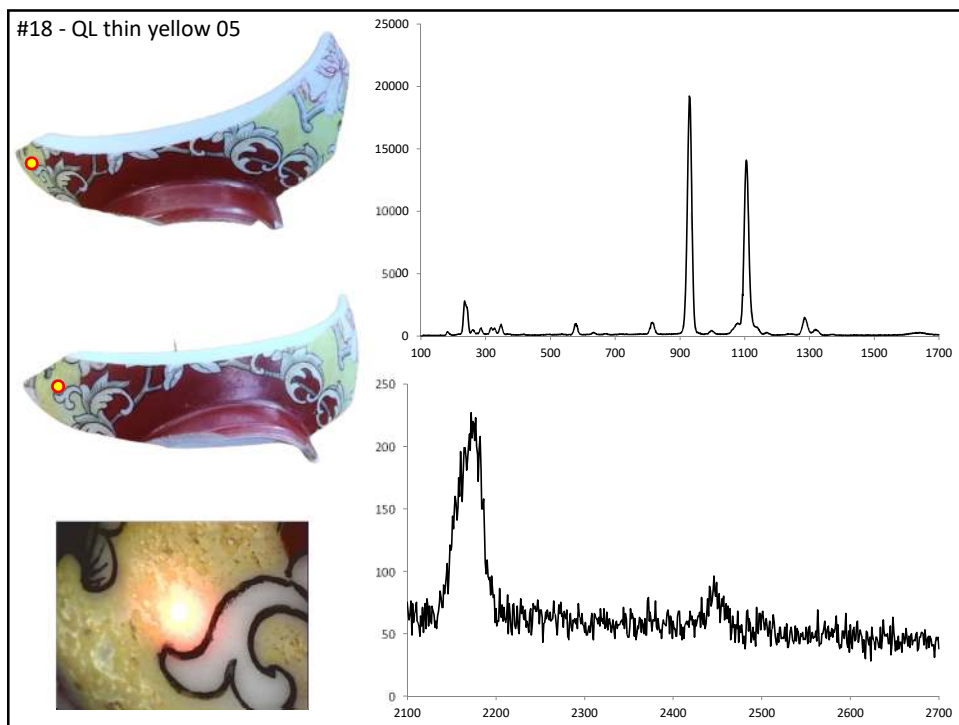

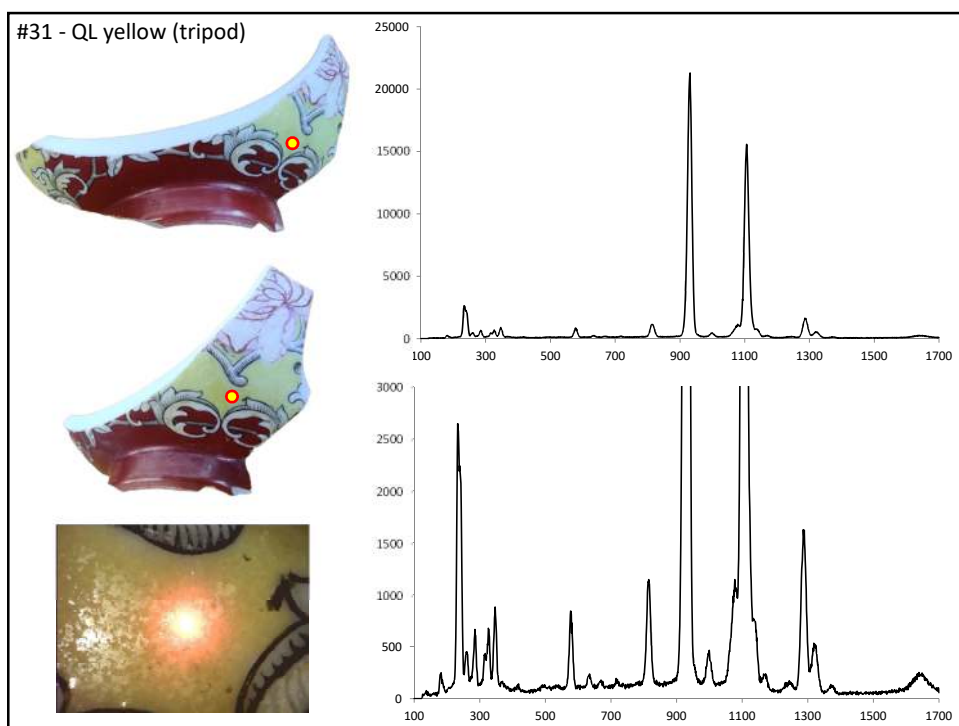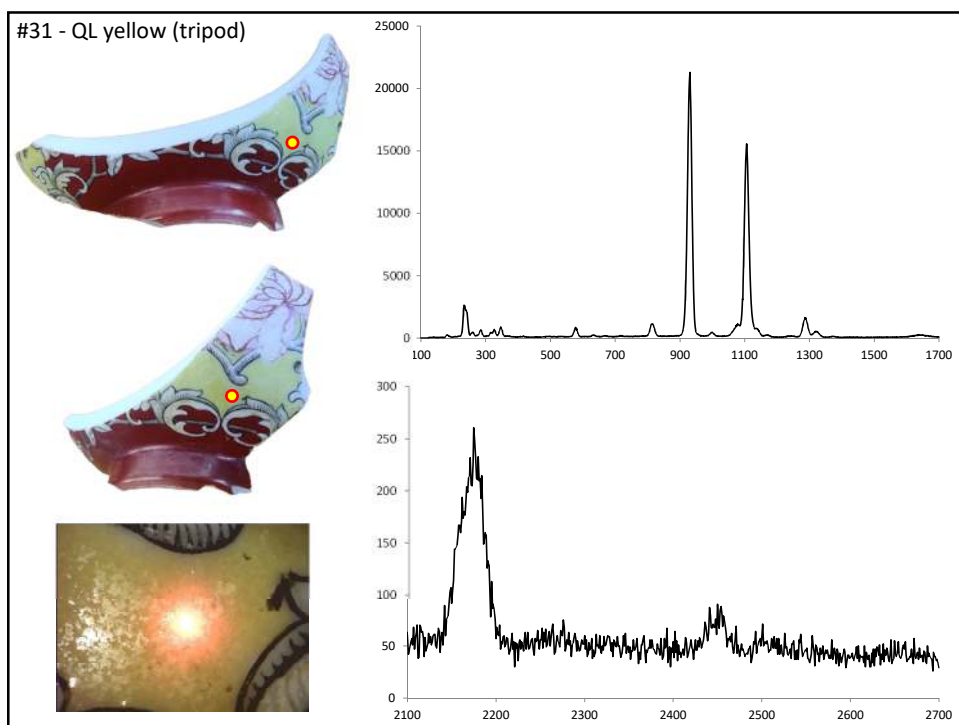

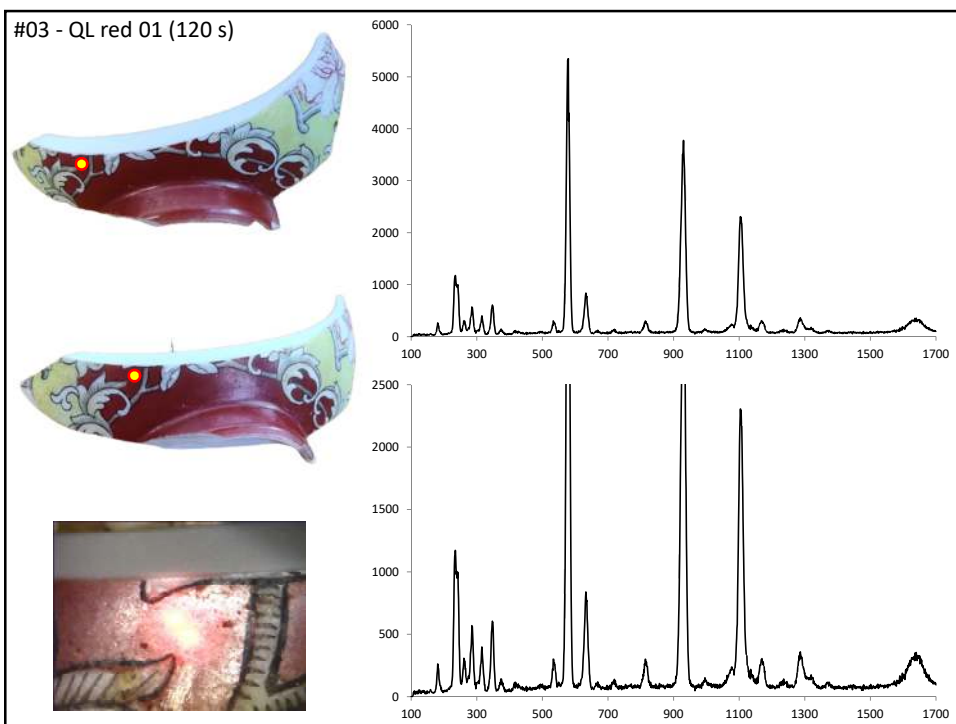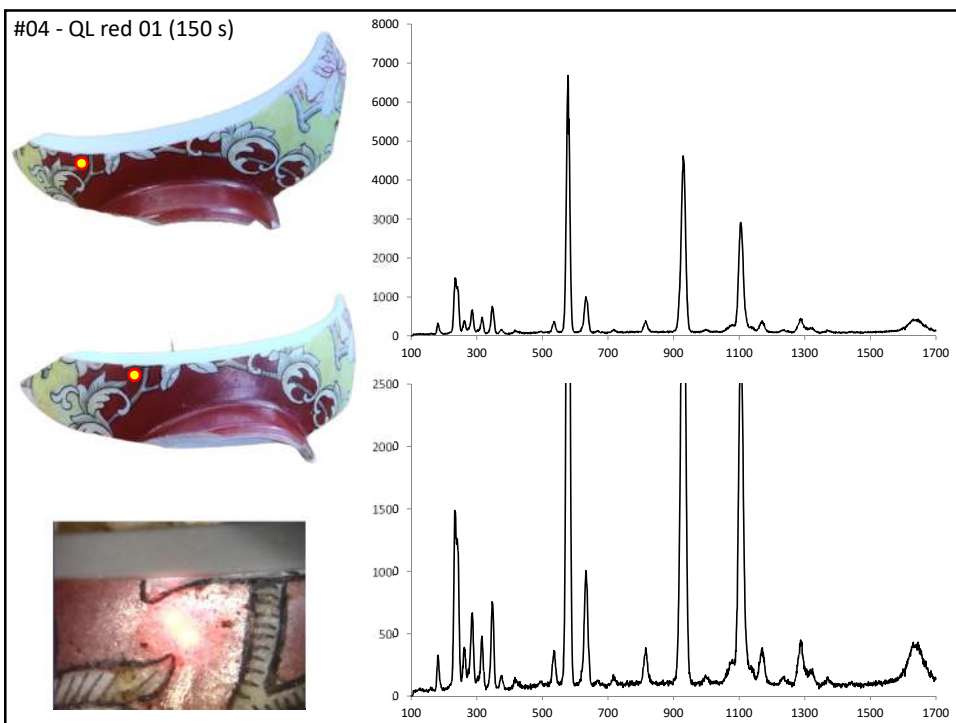



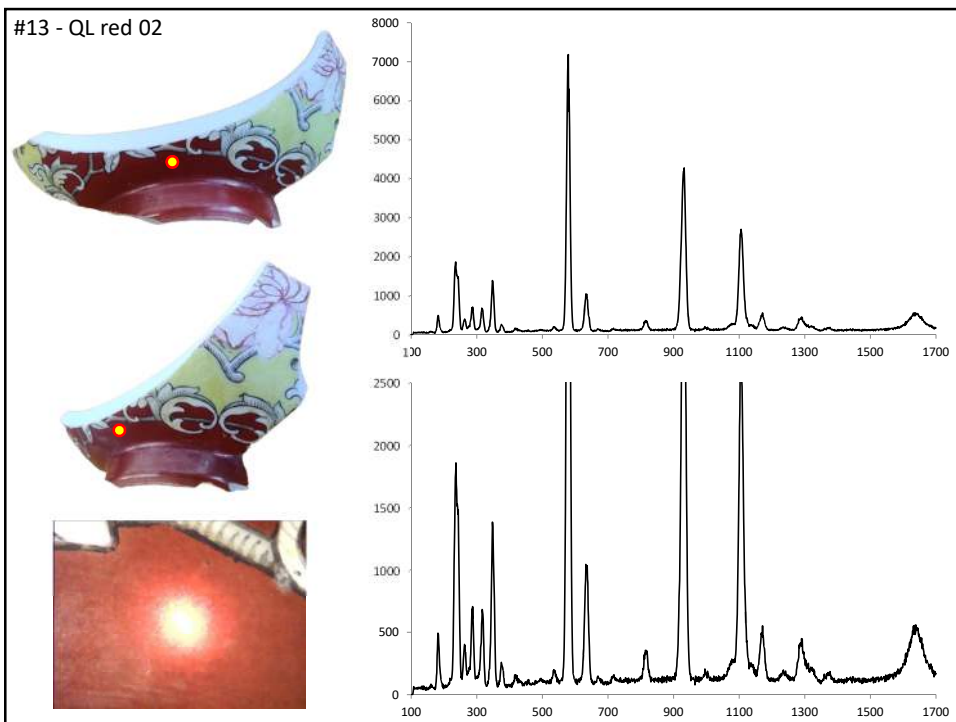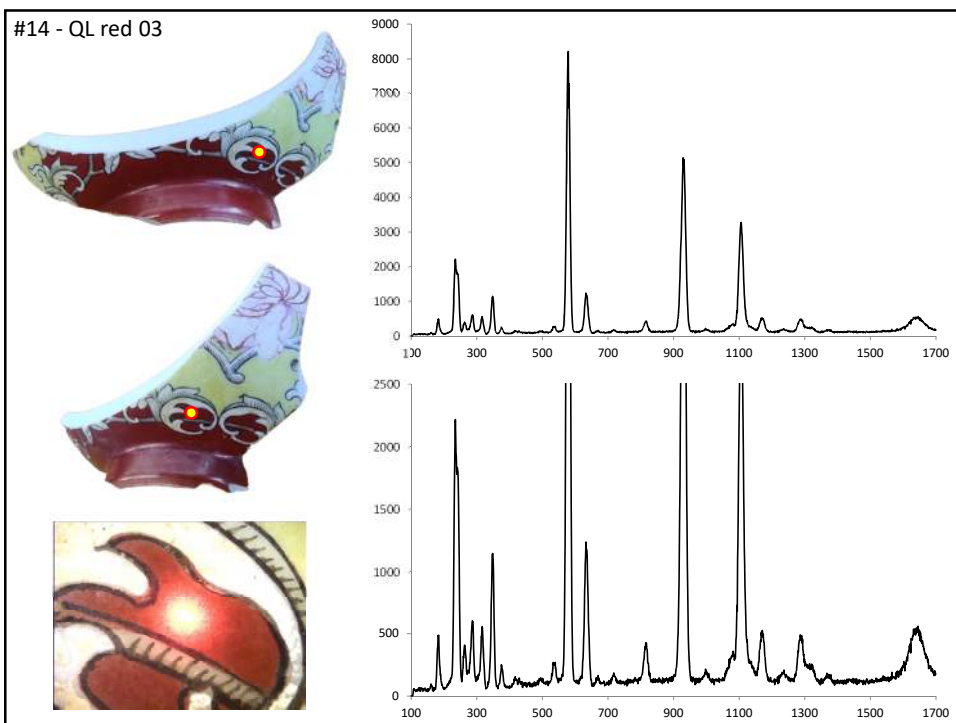



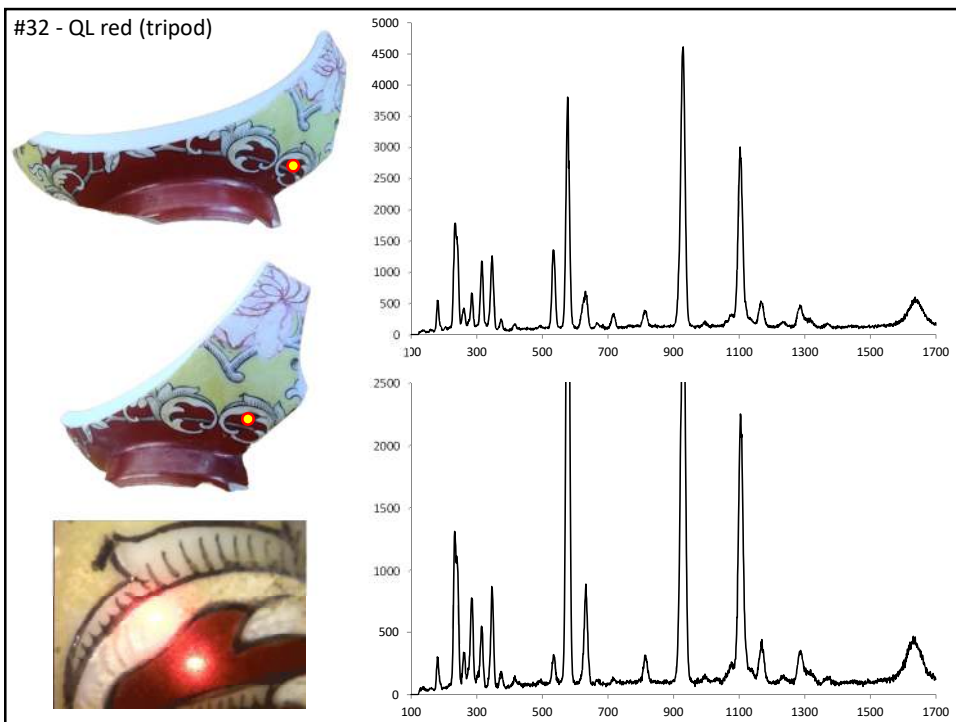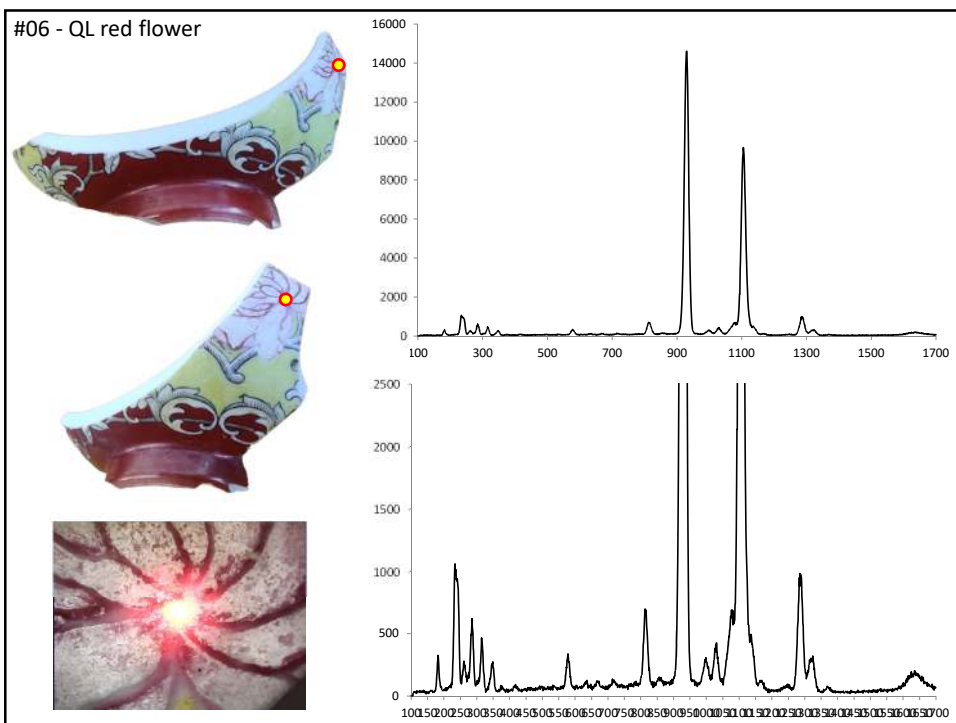

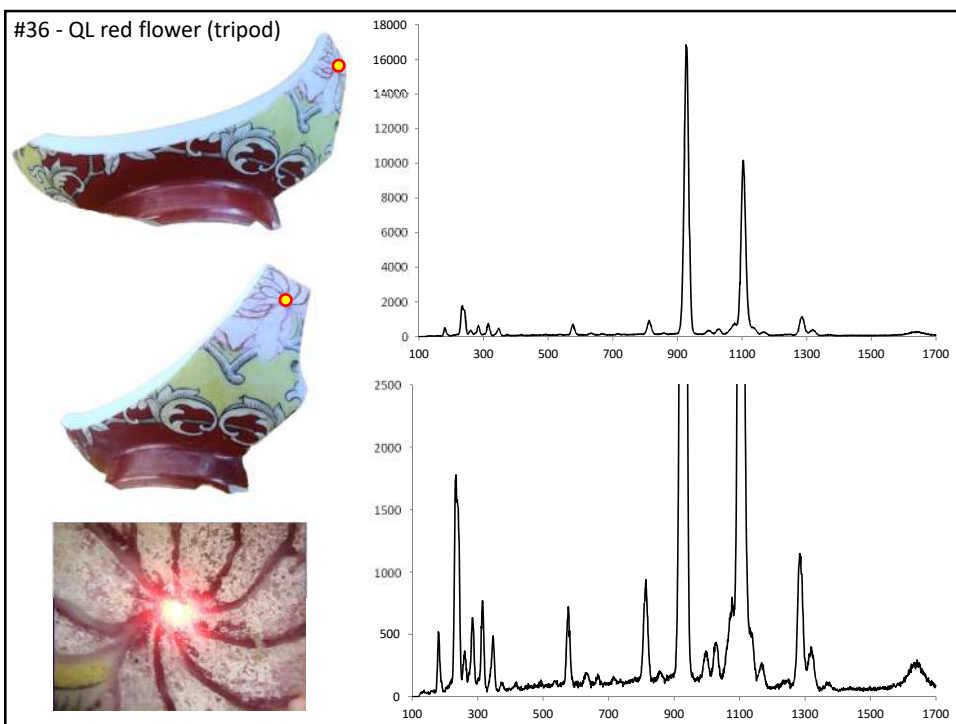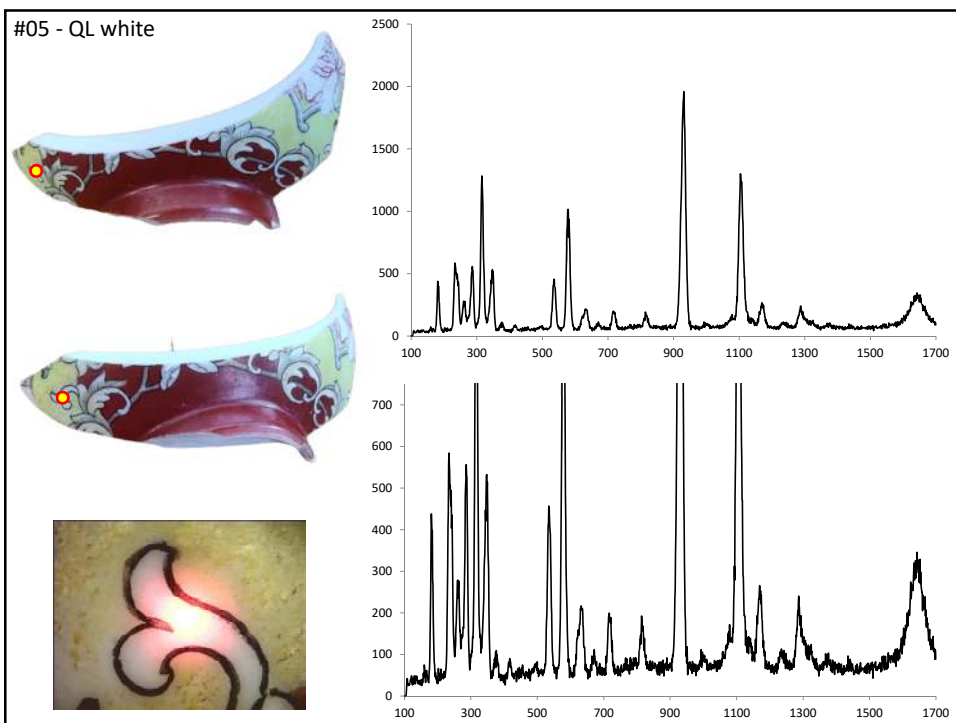

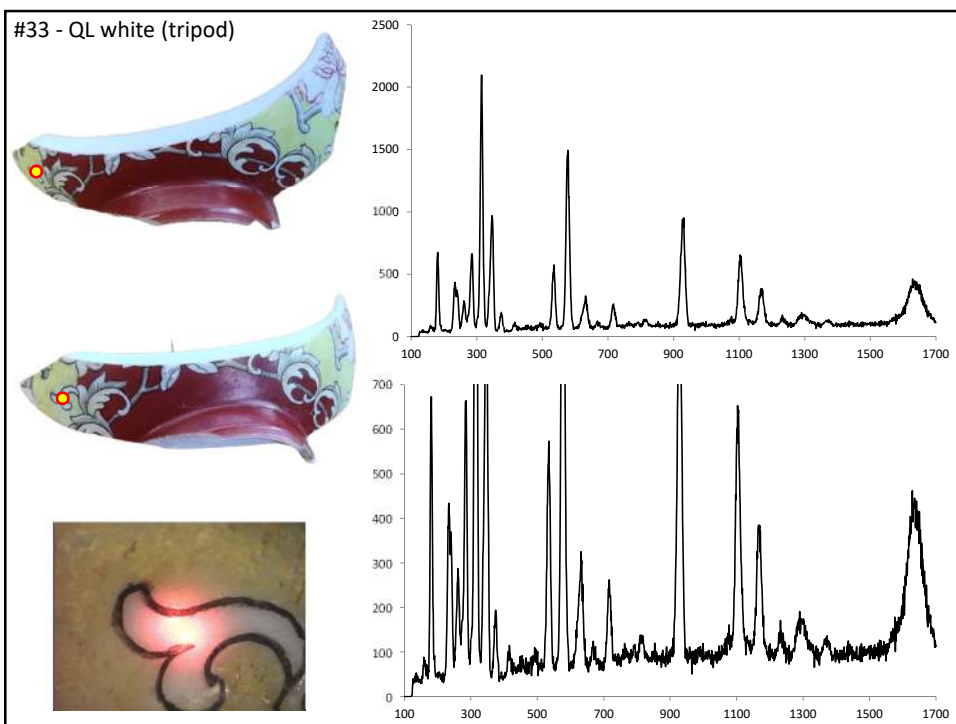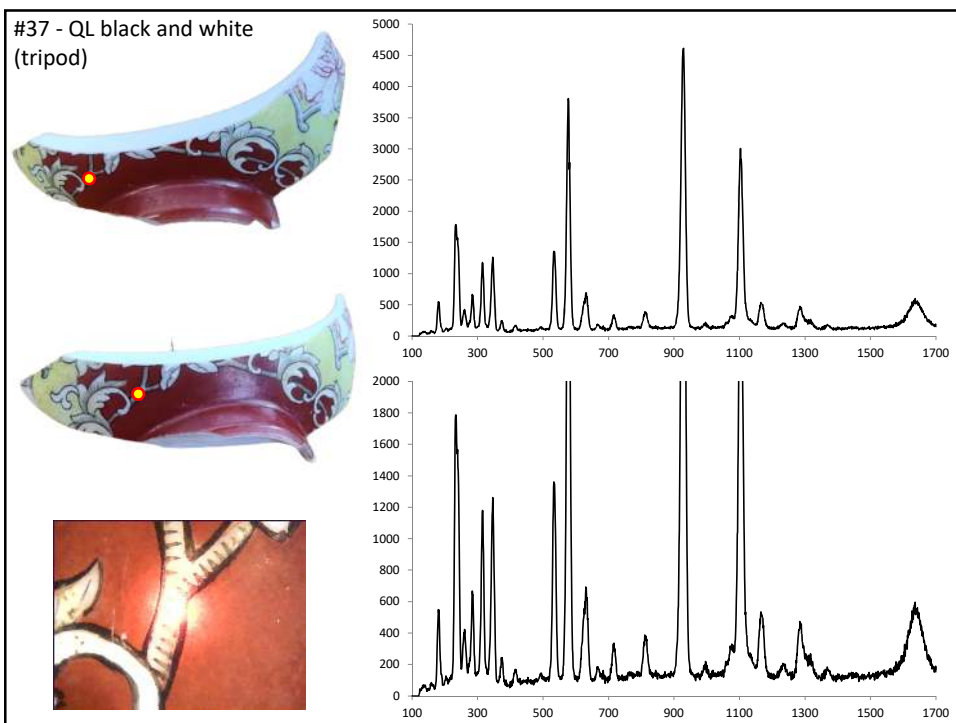

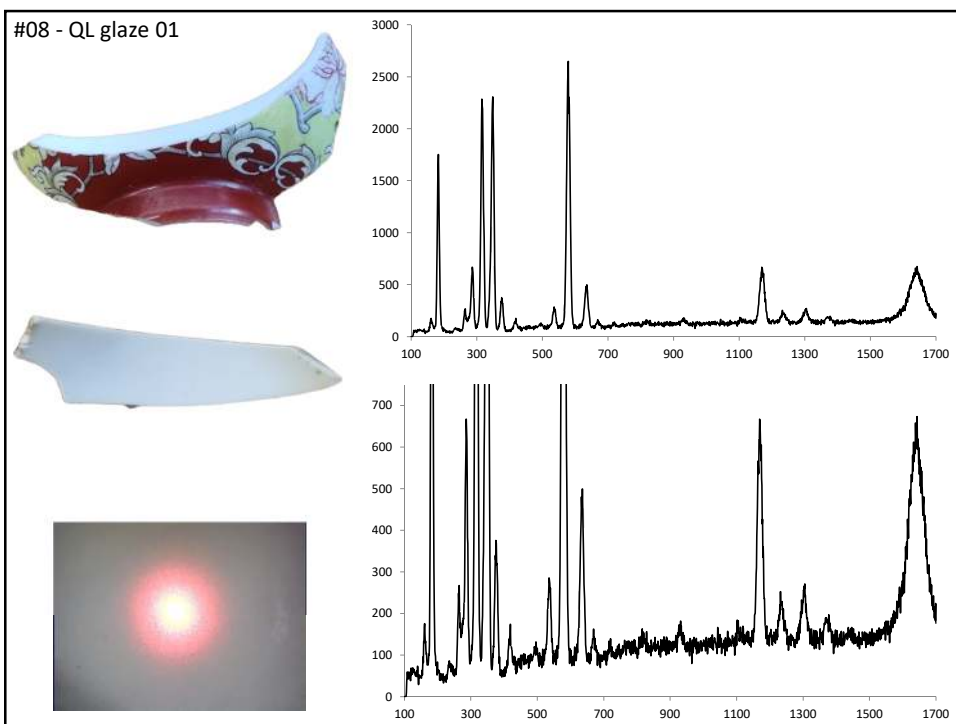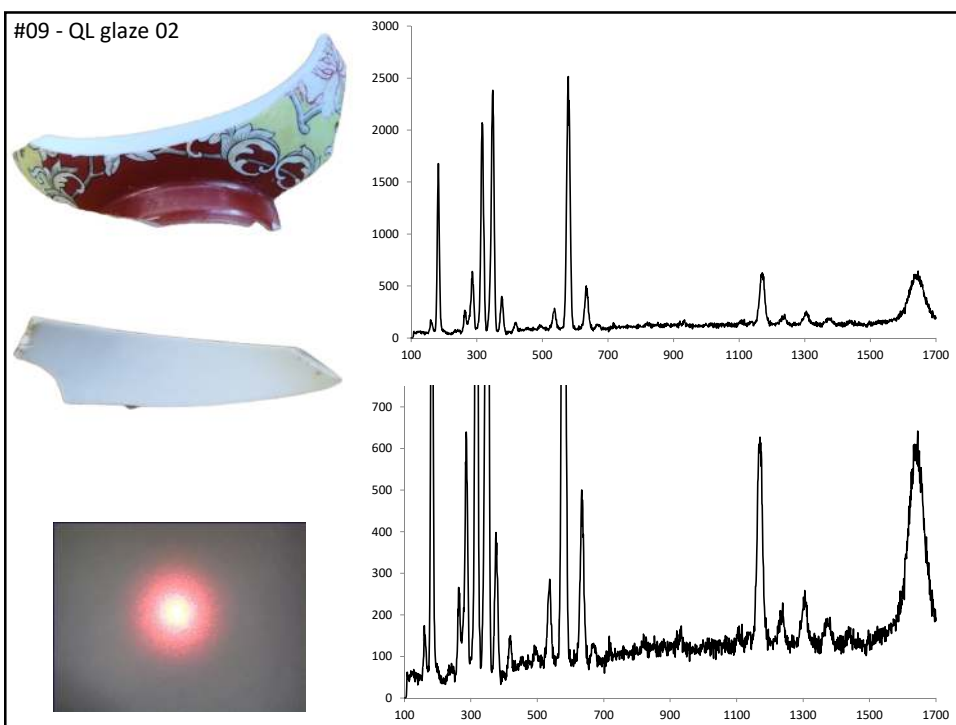

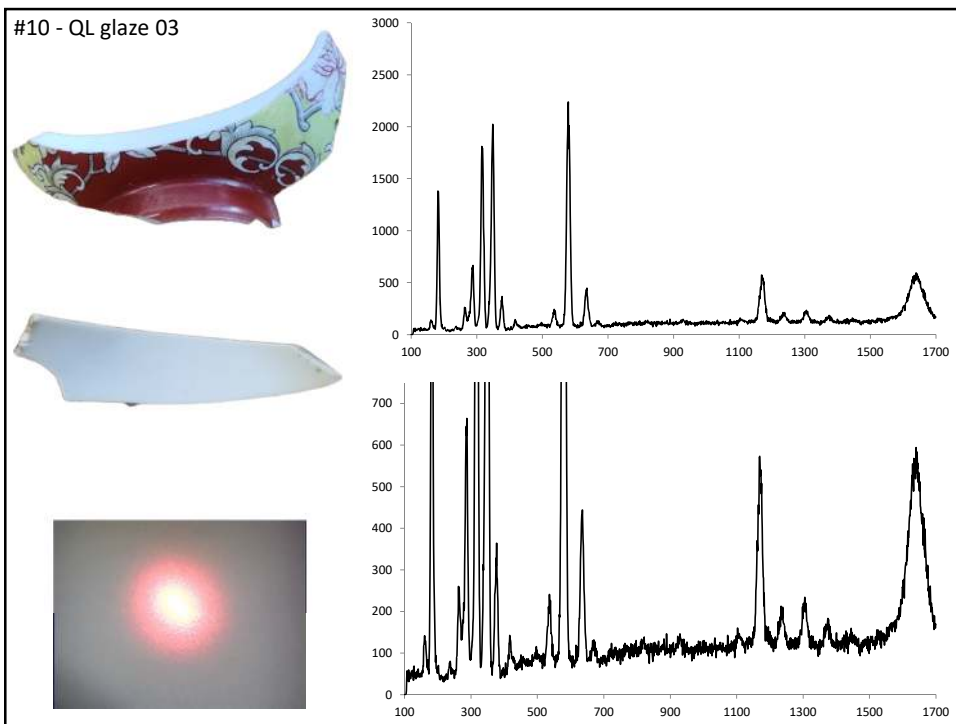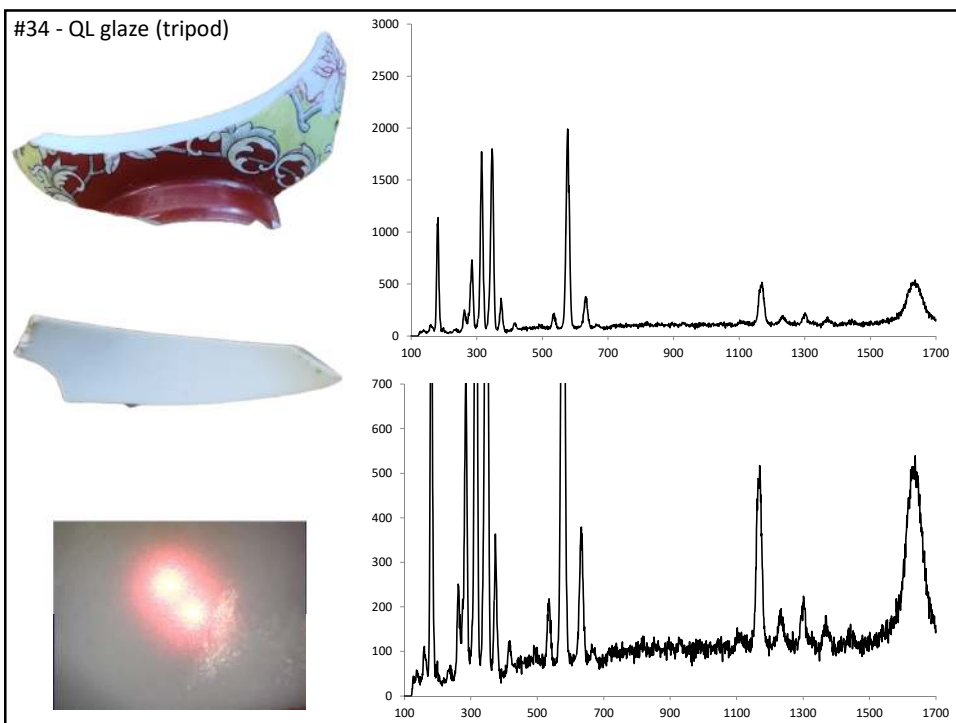

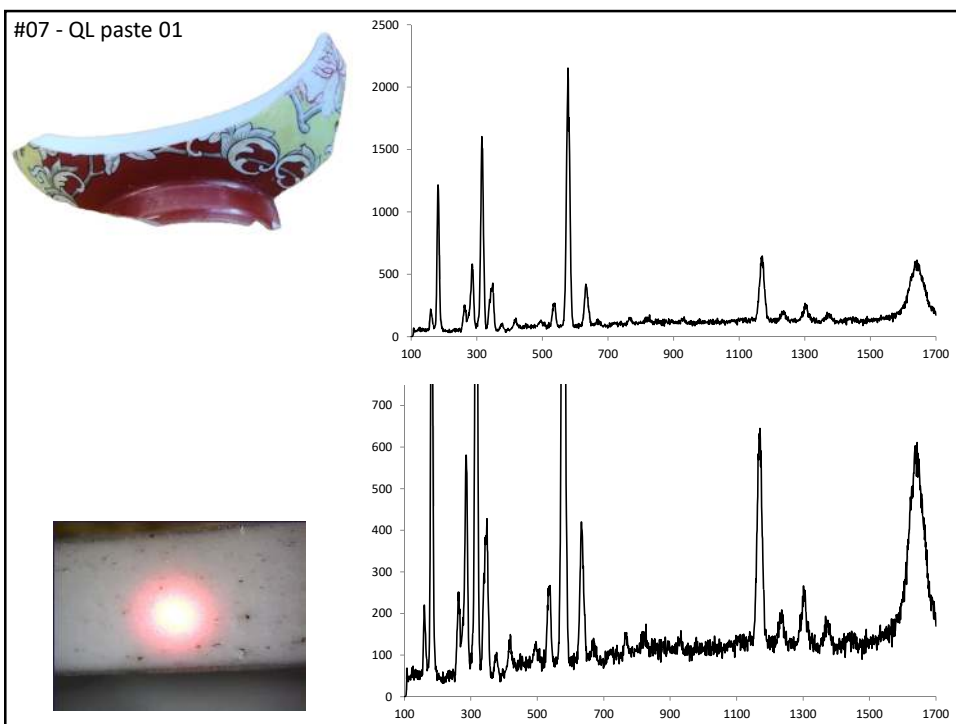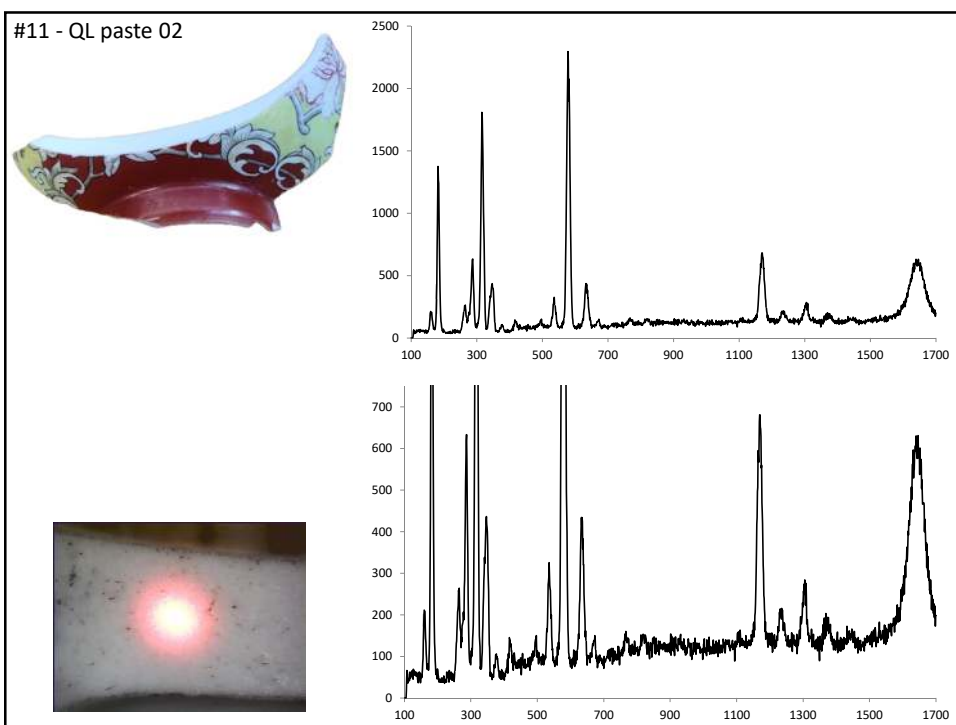

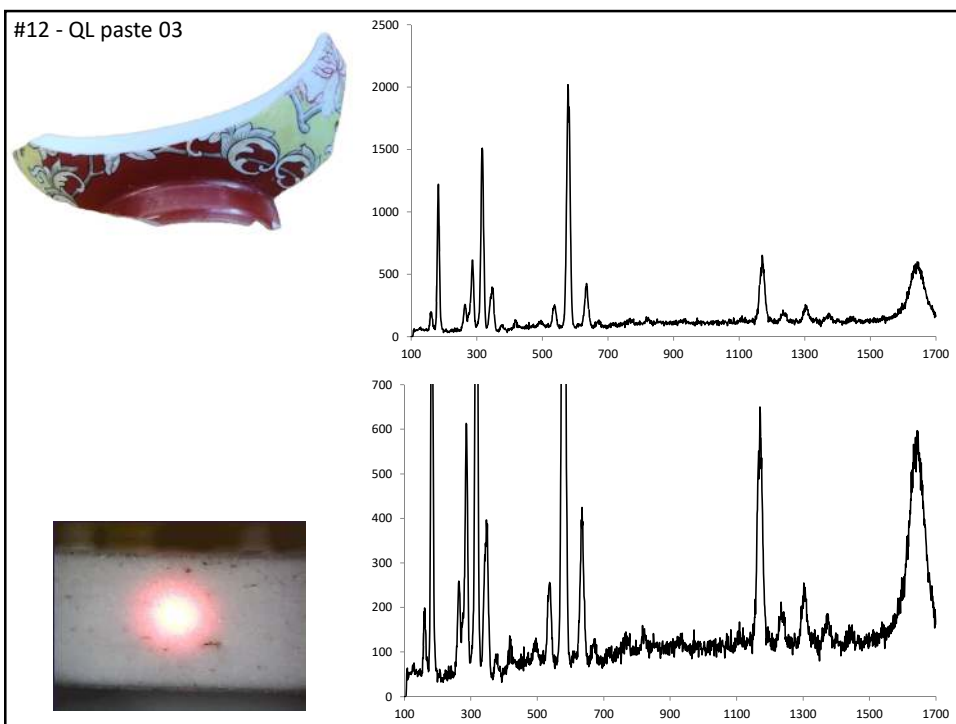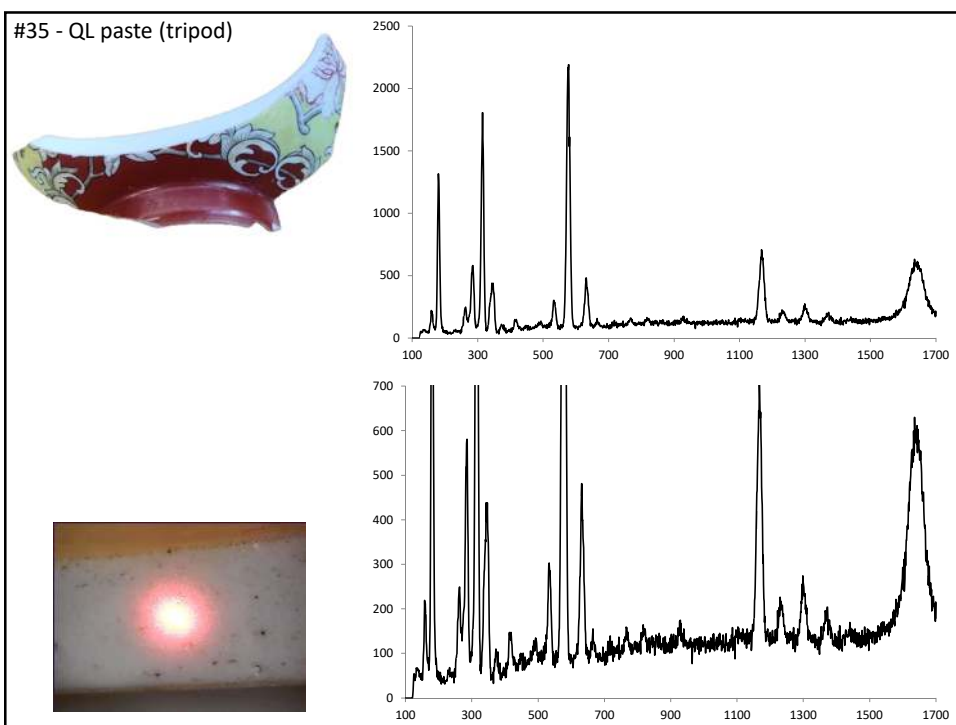



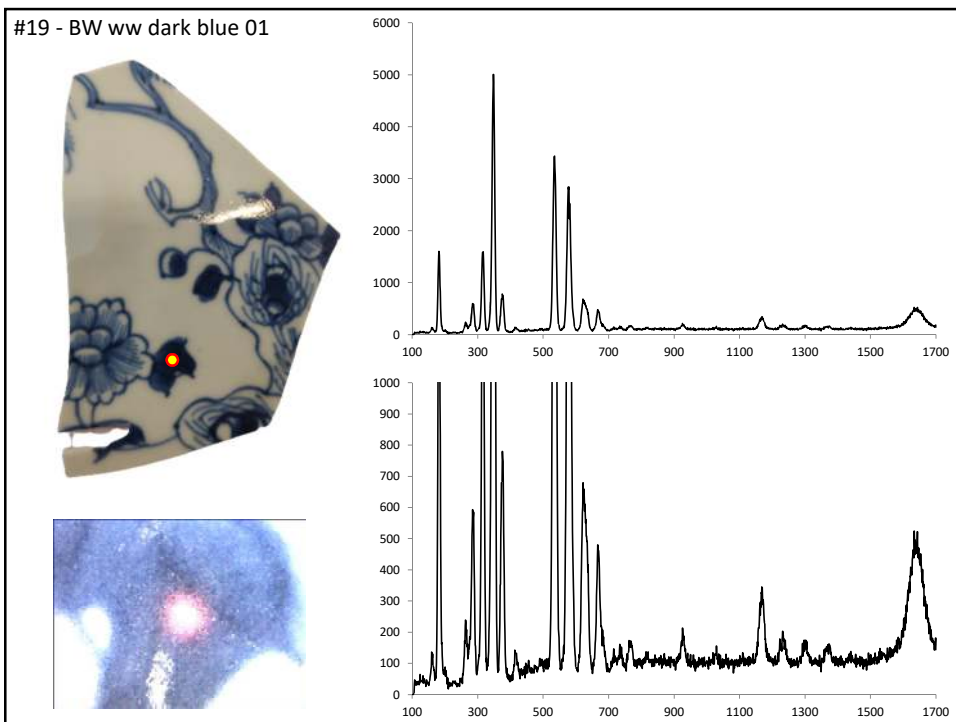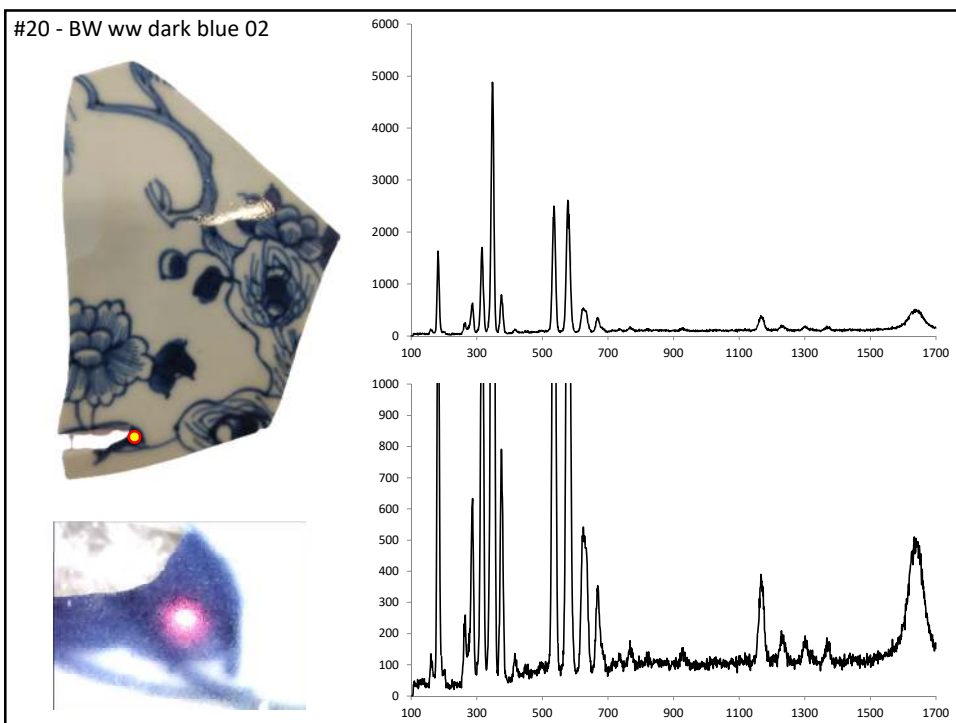

#21 - BW ww dark blue 03

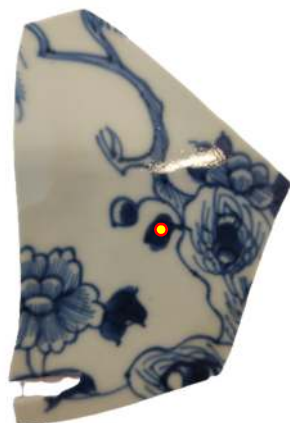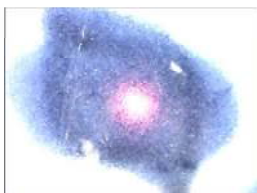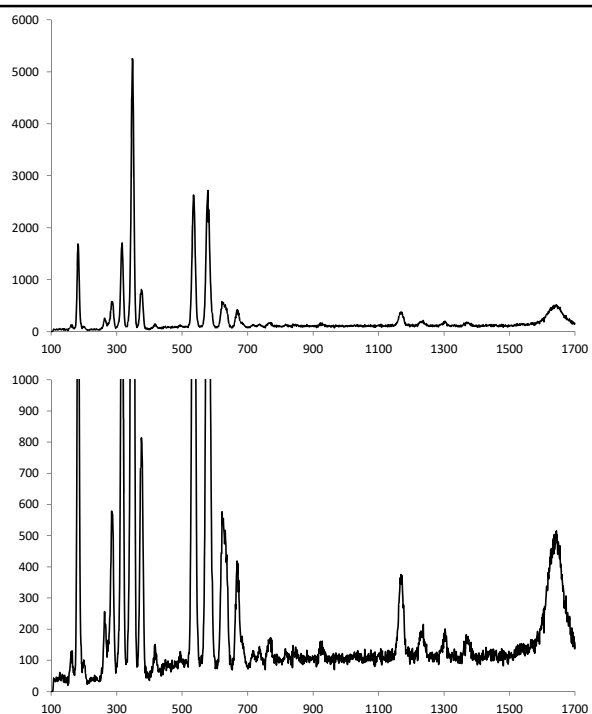

#22 - BW ww blue 01

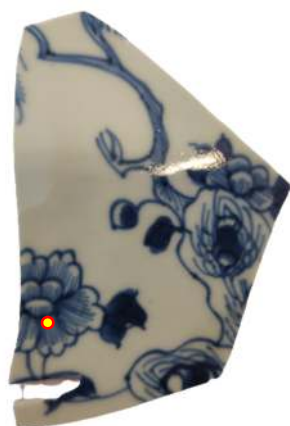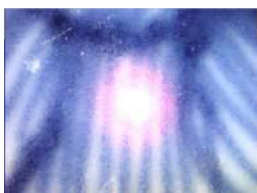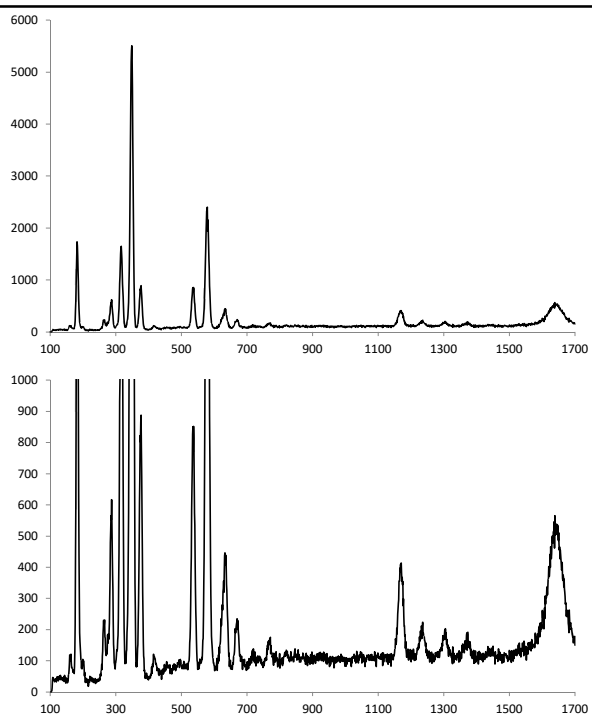

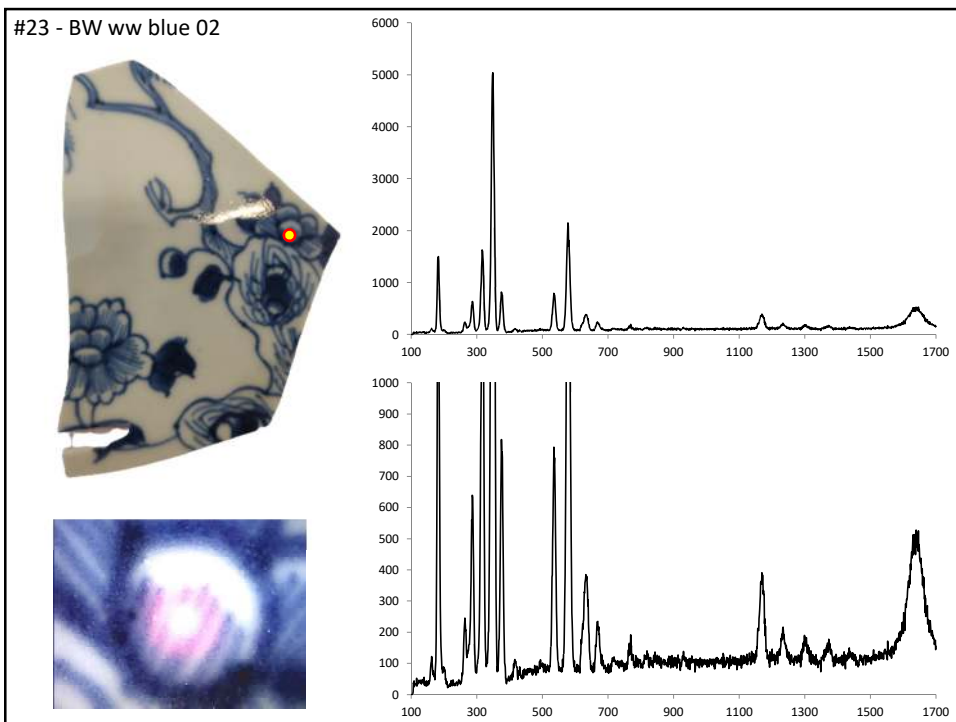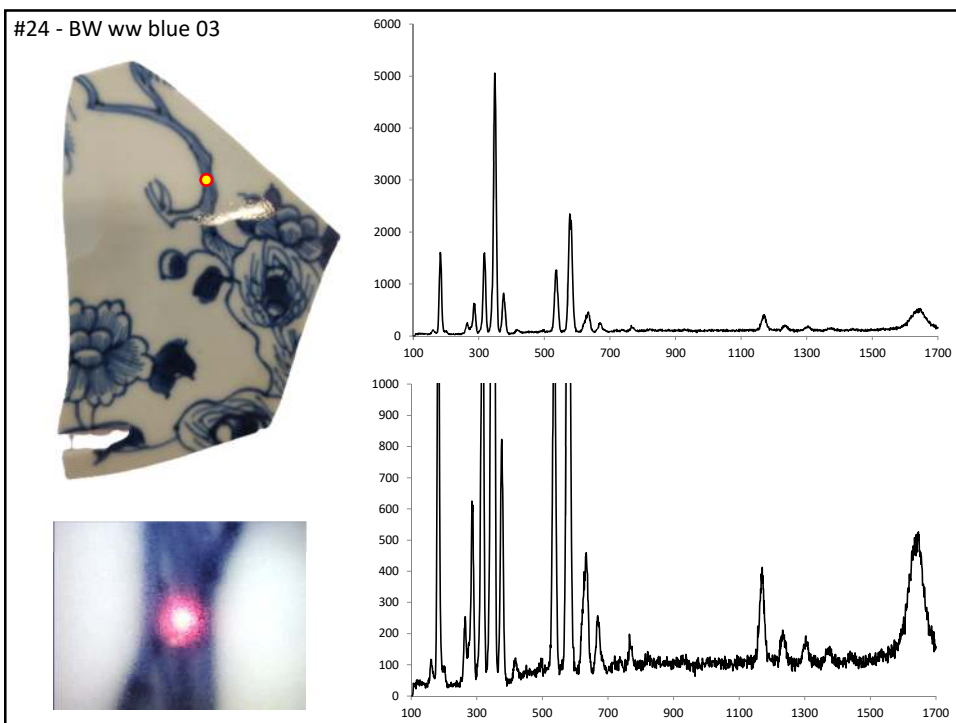

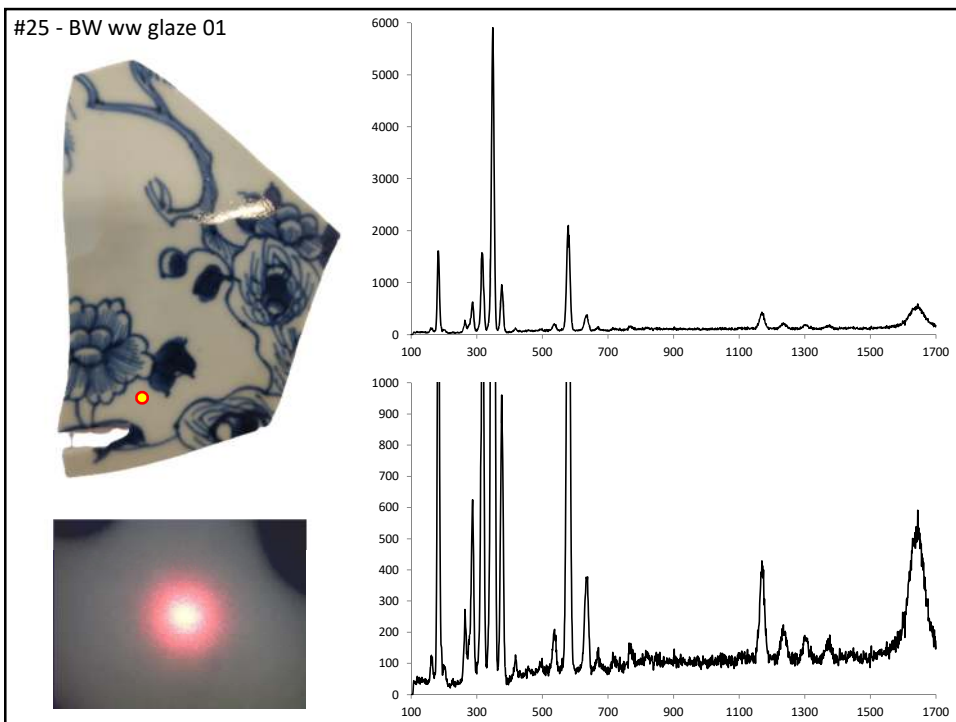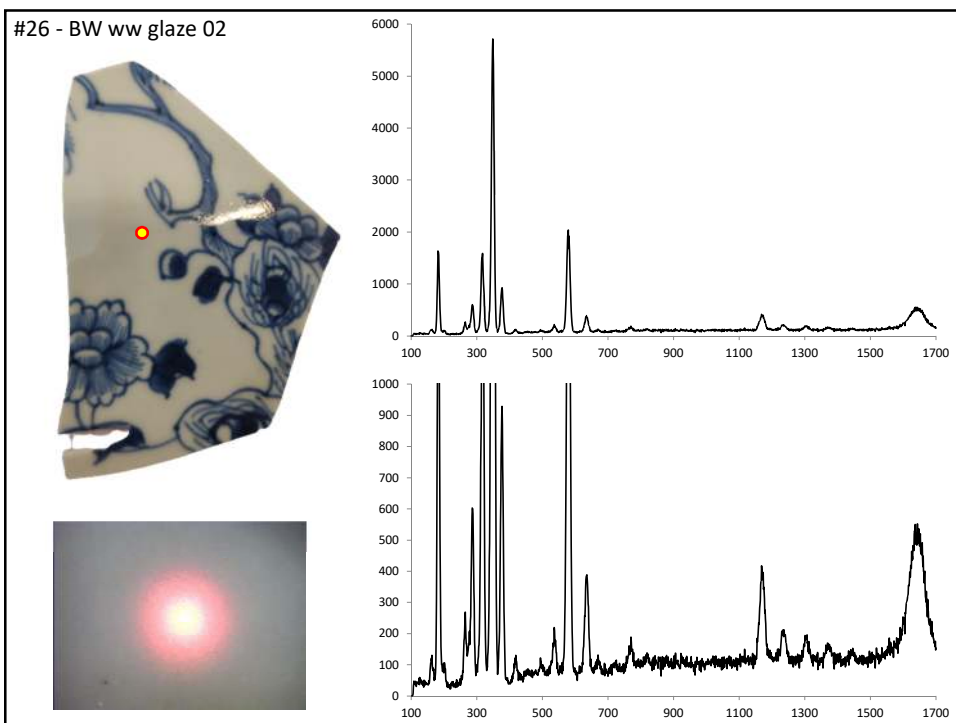

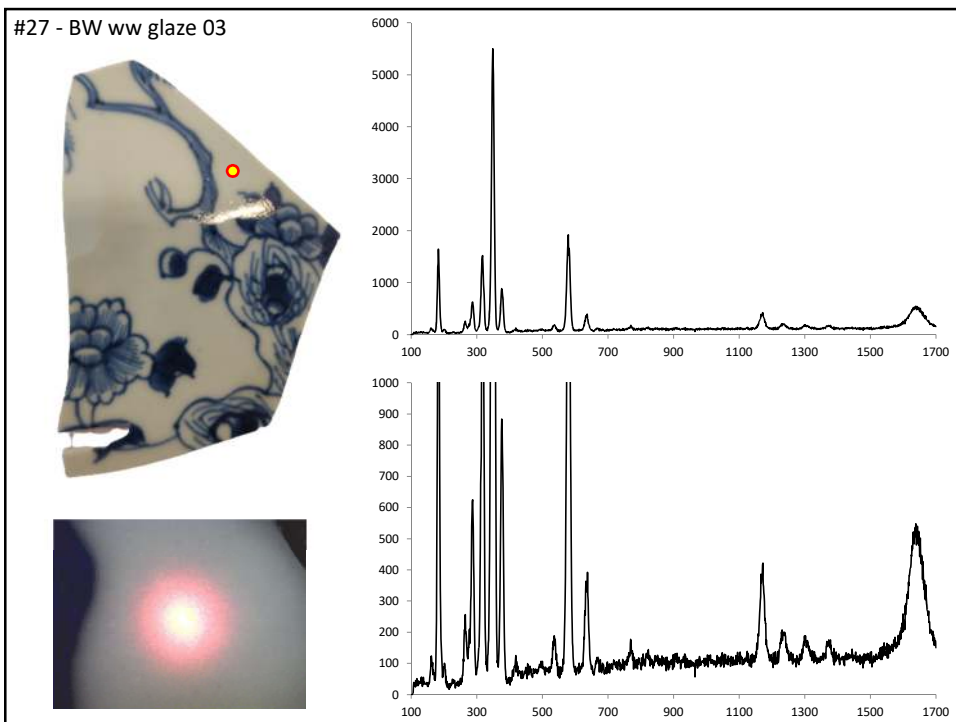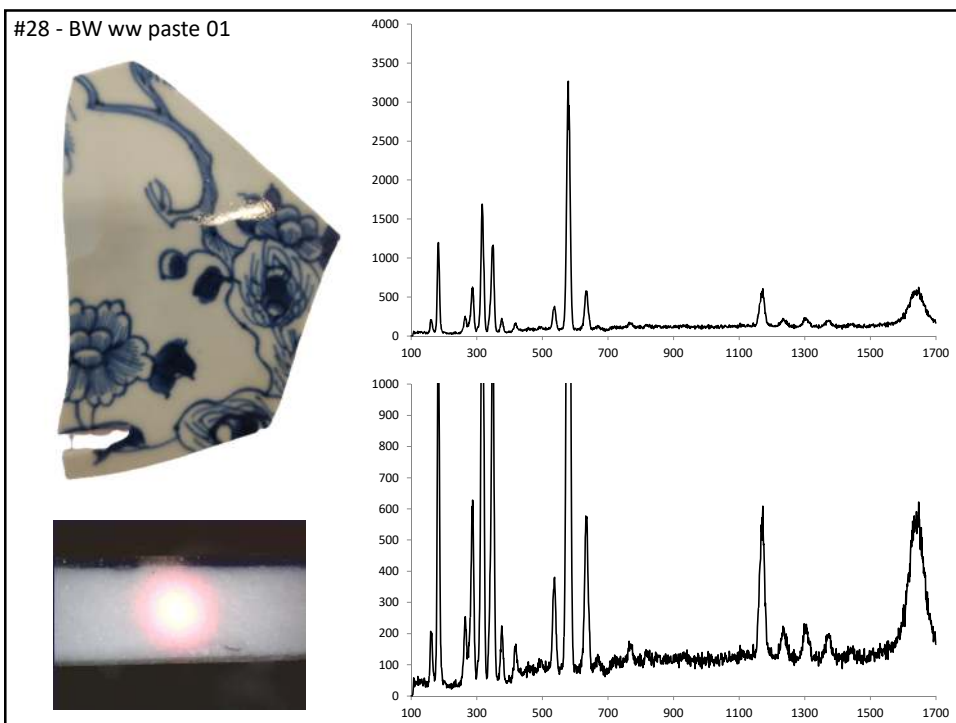

#29 - BW ww paste 02

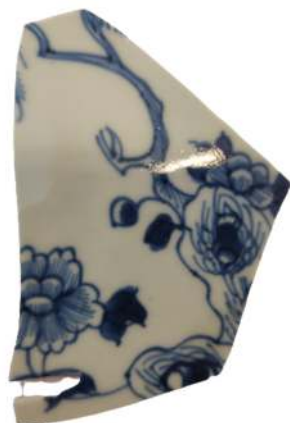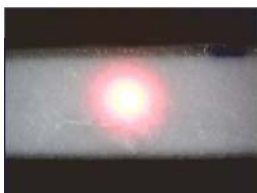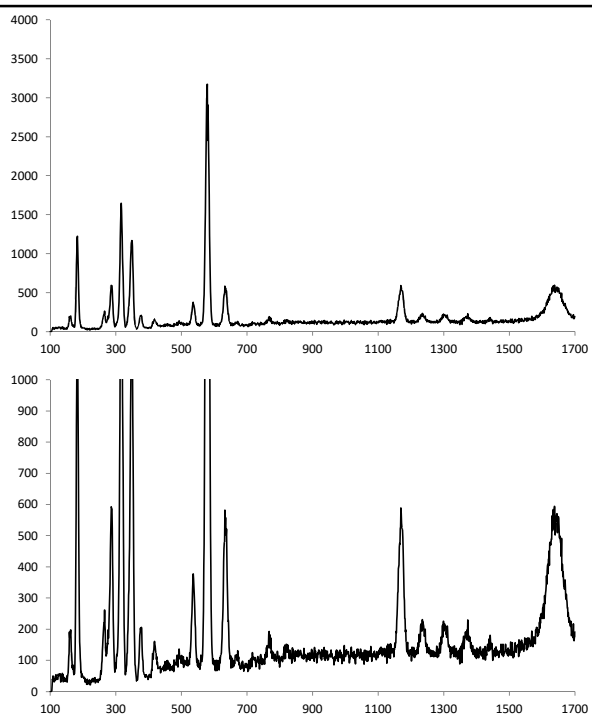

#30 - BW ww paste 03

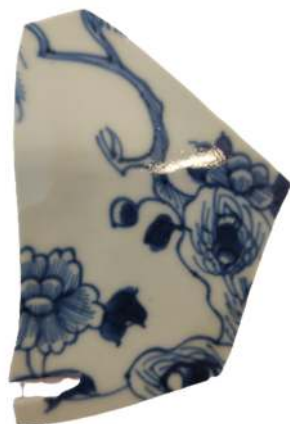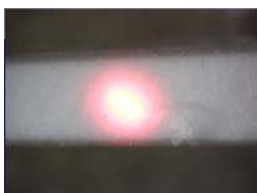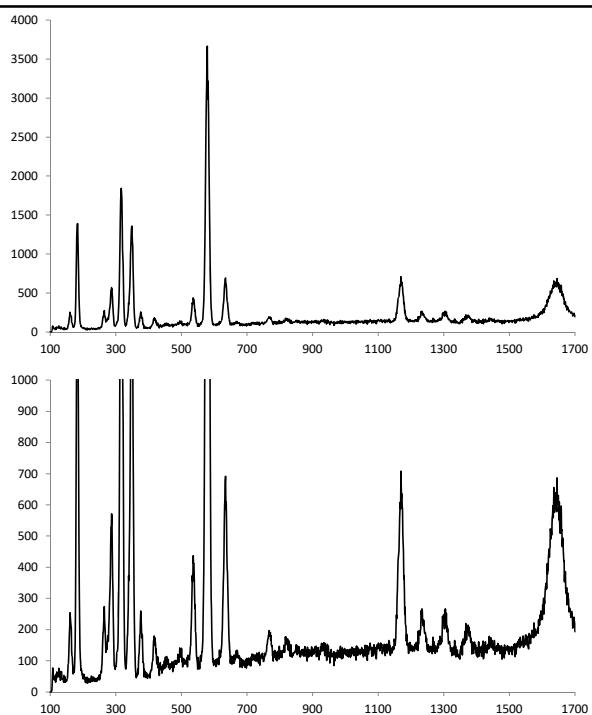

Supplement: s1 [file s1]
